# Supplementary material
Source: HighWire-hosted journal article supplement (http://ajnr-stage2.highwire.org/highwire/filestream/98591/field_highwire_adjunct_files/0/0187.pdf)
Supplement: 0187.pdf [file 0187.pdf]

**Supplemental Table 1.** Medical therapy prior to CAS.

|               | Unmatched cohort                  |                                   |         | Matched cohort                    |                                   |         |
|---------------|-----------------------------------|-----------------------------------|---------|-----------------------------------|-----------------------------------|---------|
|               | Near-occlusion<br>(n=84 patients) | Control group<br>(n=460 patients) | p Value | Near-occlusion<br>(n=84 patients) | Control group<br>(n=168 patients) | p Value |
| Aspirin       | 77%                               | 84%                               | 0.151   | 77%                               | 82%                               | 0.503   |
| Clopidogrel   | 37%                               | 40%                               | 0.628   | 37%                               | 34%                               | 0.675   |
| Statin        | 68%                               | 80%                               | 0.021   | 68%                               | 72%                               | 0.464   |
| ACE inhibitor | 69%                               | 74%                               | 0.423   | 69%                               | 71%                               | 0.770   |
| Beta-blocker  | 58%                               | 61%                               | 0.628   | 58%                               | 58%                               | 1.000   |

**Supplemental Table 2.** Thirty-day major adverse events and long-term survival, symptomatic patients only.

|                                                               | Unmatched cohort                  |                                   |         | Matched cohort                    |                                  |         |
|---------------------------------------------------------------|-----------------------------------|-----------------------------------|---------|-----------------------------------|----------------------------------|---------|
|                                                               | Near-occlusion<br>(n=38 patients) | Control group<br>(n=132 patients) | p Value | Near-occlusion<br>(n=38 patients) | Control group<br>(n=78 patients) | p Value |
| TIA during hospitalization, n (%)                             | 3 (7.9)                           | 5 (3.8)                           | 0.380   | 3 (7.9)                           | 5 (6.4)                          | 0.716   |
| A: Minor stroke during hospitalization, n (%)                 | 1 (2.6)                           | 3 (2.3)                           | 1.000   | 1 (2.6)                           | 2 (2.6)                          | 1.000   |
| B: Major stroke during hospitalization, n (%)                 | 1 (2.6)                           | 3 (2.3)                           | 1.000   | 1 (2.6)                           | 3 (3.9)                          | 1.000   |
| Hyperperfusion syndrome, n (%)                                | 0                                 | 0                                 | -       | 0                                 | 0                                | -       |
| Myocardial infarction during hospitalization, n (%)           | 1 (2.6)                           | 0 (0)                             | 0.224   | 1 (2.6)                           | 0                                | 0.328   |
| Death during hospitalization, n (%)                           | 2 (5.3)                           | 1 (0.8)                           | 0.126   | 2 (5.3)                           | 0                                | 0.105   |
| C: Minor stroke in 30 days, n (%)                             | 0                                 | 2 (1.5)                           | 1.000   | 0                                 | 2 (2.6)                          | 1.000   |
| D: Major stroke in 30 days, n (%)                             | 1 (2.6)                           | 0                                 | 0.224   | 1 (2.6)                           | 0                                | 0.328   |
| E: Death in 30 days (including during hospitalization), n (%) | 2 (5.3)                           | 1 (0.8)                           | 0.126   | 2 (5.3)                           | 0                                | 0.105   |
| Primary endpoint – A+B+C+D+E, n (%)                           | 4 (10.5)                          | 9 (6.8)                           | 0.490   | 4 (10.5)                          | 7 (9.0)                          | 0.748   |

|                                                       |           |           |       |           |           |       |
|-------------------------------------------------------|-----------|-----------|-------|-----------|-----------|-------|
| Reintervention for restenosis during follow-up, n (%) | 3 (7.9)   | 5 (3.8)   | 0.380 | 3 (7.9)   | 2 (2.6)   | 0.329 |
| All-cause mortality during follow-up, n (%)           | 18 (47.4) | 70 (53.0) | 0.584 | 18 (47.4) | 42 (70.0) | 0.557 |
| Cardiovascular death, n (%)                           | 12 (31.6) | 46 (34.9) | 0.846 | 12 (31.6) | 29 (37.2) | 0.680 |
| Non-cardiovascular death, n (%)                       | 5 (13.2)  | 22 (16.7) | 0.802 | 5 (13.2)  | 12 (15.4) | 1.000 |
| Unknown death, n (%)                                  | 1 (2.6)   | 2 (1.5)   | 0.534 | 1 (2.6)   | 1 (1.3)   | 0.550 |

**Supplemental Table 3.** Thirty-day major adverse events and long-term survival, asymptomatic patients only.

|                                                               | Unmatched cohort                  |                                   |         | Matched cohort                    |                                  |         |
|---------------------------------------------------------------|-----------------------------------|-----------------------------------|---------|-----------------------------------|----------------------------------|---------|
|                                                               | Near-occlusion<br>(n=46 patients) | Control group<br>(n=328 patients) | p Value | Near-occlusion<br>(n=46 patients) | Control group<br>(n=90 patients) | p Value |
| TIA during hospitalization, n (%)                             | 3 (6.5)                           | 7 (2.1)                           | 0.113   | 3 (6.5)                           | 2 (2.2)                          | 0.336   |
| A: Minor stroke during hospitalization, n (%)                 | 2 (4.4)                           | 2 (0.6)                           | 0.076   | 2 (4.4)                           | 1 (1.1)                          | 0.264   |
| B: Major stroke during hospitalization, n (%)                 | 0                                 | 3 (0.9)                           | 1.000   | 0                                 | 1 (1.1)                          | 1.000   |
| Hyperperfusion syndrome, n (%)                                | 0                                 | 2 (0.6)                           | 1.000   | 0                                 | 0                                | -       |
| Myocardial infarction during hospitalization, n (%)           | 0                                 | 0                                 | -       | 0                                 | 0                                | -       |
| Death during hospitalization, n (%)                           | 0                                 | 1 (0.3)                           | 1.000   | 0                                 | 0                                | -       |
| C: Minor stroke in 30 days, n (%)                             | 0                                 | 2 (0.6)                           | 1.000   | 0                                 | 0                                | -       |
| D: Major stroke in 30 days, n (%)                             | 0                                 | 2 (0.6)                           | 1.000   | 0                                 | 1 (1.1)                          | 1.000   |
| E: Death in 30 days (including during hospitalization), n (%) | 1 (2.2)                           | 2 (0.6)                           | 0.326   | 1 (2.2)                           | 1 (1.1)                          | 1.000   |
| Primary endpoint – A+B+C+D+E, n (%)                           | 3 (6.5)                           | 10 (3.1)                          | 0.206   | 3 (6.5)                           | 4 (4.4)                          | 0.688   |

|                                                       |           |            |       |           |           |       |
|-------------------------------------------------------|-----------|------------|-------|-----------|-----------|-------|
| Reintervention for restenosis during follow-up, n (%) | 6 (13.0)  | 14 (4.3)   | 0.025 | 6 (13.0)  | 4 (4.4)   | 0.087 |
| All-cause mortality during follow-up, n (%)           | 15 (32.6) | 132 (40.2) | 0.339 | 15 (32.6) | 34 (37.8) | 0.577 |
| Cardiovascular death, n (%)                           | 13 (28.3) | 83 (25.3)  | 0.719 | 13 (28.3) | 24 (26.7) | 0.841 |
| Non-cardiovascular death, n (%)                       | 1 (2.2)   | 42 (12.8)  | 0.044 | 1 (2.2)   | 7 (7.8)   | 0.266 |
| Unknown death, n (%)                                  | 1 (2.2)   | 7 (2.1)    | 1.000 | 1 (2.2)   | 3 (3.3)   | 1.000 |

**Supplemental Table 4.** Angiographic and procedural characteristics.

|                                                      | Unmatched cohort                  |                                   |         | Matched cohort                    |                                   |         |
|------------------------------------------------------|-----------------------------------|-----------------------------------|---------|-----------------------------------|-----------------------------------|---------|
|                                                      | Near-occlusion<br>(n=84 patients) | Control group<br>(n=460 patients) | p Value | Near-occlusion<br>(n=84 patients) | Control group<br>(n=168 patients) | p Value |
| Lesion in left ICA                                   | 51%                               | 54%                               | 0.542   | 51%                               | 53%                               | 0.783   |
| Ostial ICA lesion                                    | 73%                               | 69%                               | 0.606   | 73%                               | 73%                               | 1.000   |
| Tandem ICA lesion                                    | 21%                               | 15%                               | 0.149   | 21%                               | 17%                               | 0.494   |
| Restenosis after endarterectomy                      | 7%                                | 5%                                | 0.428   | 7%                                | 6%                                | 0.786   |
| Stenosis at baseline, mean $\pm$ SD,<br>median (IQR) | -                                 | 81 $\pm$ 8.4<br>80.0 (75;90)      | -       | -                                 | 80 $\pm$ 8.9<br>80.0 (73; 90)     | -       |
| Residual stenosis, mean $\pm$ SD,<br>median (IQR)    | 8.6 $\pm$ 8.3<br>10 (0;10)        | 9.4 $\pm$ 8.7<br>10 (0;15)        | 0.421   | 8.6 $\pm$ 8.3<br>10 (0;10)        | 10.3 $\pm$ 9.1<br>10 (0;15)       | 0.124   |
| Contralateral ICA occlusion                          | 8%                                | 12%                               | 0.455   | 8%                                | 13%                               | 0.301   |

|                                                         |                                  |                                |        |                                  |                                 |        |
|---------------------------------------------------------|----------------------------------|--------------------------------|--------|----------------------------------|---------------------------------|--------|
| Contralateral stenosis > 50%                            | 25%                              | 29%                            | 0.435  | 25%                              | 34%                             | 0.193  |
| Contrast medium (ml), mean $\pm$ SD,<br>median (IQR)    | 118 $\pm$ 45<br>100 (80; 130)    | 118 $\pm$ 42<br>100 (80;150)   | 0.885  | 118 $\pm$ 45<br>100 (80; 130)    | 120 $\pm$ 45<br>100 (90; 150)   | 0.649  |
| Direct stenting without predilatation                   | 58%                              | 90%                            | <0.001 | 58%                              | 88%                             | <0.001 |
| Stent length (mm), mean $\pm$ SD                        | 40 $\pm$ 11                      | 38 $\pm$ 9                     | 0.066  | 40 $\pm$ 11                      | 39 $\pm$ 8                      | 0.424  |
| Administration of atropine during procedure             | 58%                              | 49%                            | 0.154  | 58%                              | 53%                             | 0.502  |
| Balloon postdilatation                                  | 88%                              | 92%                            | 0.197  | 88%                              | 91%                             | 0.505  |
| Fluoroscopic time (min), median (IQR),<br>mean $\pm$ SD | 7.9 (5.8; 11.1)<br>9.3 $\pm$ 5.1 | 6.5 (5.0;9.0)<br>7.6 $\pm$ 4.2 | 0.002  | 7.9 (5.8; 11.1)<br>9.3 $\pm$ 5.1 | 6.7 (5.0; 9.5)<br>7.8 $\pm$ 4.5 | 0.022  |
| Severe tortuosity                                       | 12%                              | 9%                             | 0.555  | 12%                              | 11%                             | 0.697  |
| Severe calcification                                    | 23%                              | 28%                            | 0.269  | 23%                              | 31 %                            | 0.196  |
| Simultaneous coronary angiography                       | 13%                              | 14%                            | 1.000  | 13%                              | 11 %                            | 0.676  |
| Simultaneous percutaneous coronary<br>intervention      | 1%                               | 3%                             | 0.707  | 1%                               | 3%                              | 0.667  |

| Stent type*         |      |      |       |     |     |       |
|---------------------|------|------|-------|-----|-----|-------|
| XACT                | 36 % | 30 % | 0.371 | 36% | 32% | 0.570 |
| Wallstent           | 31%  | 21%  | 0.045 | 31% | 20% | 0.058 |
| Sinus               | 21%  | 22%  | 1.000 | 21% | 27% | 0.358 |
| Cristallo Ideale    | 8%   | 11%  | 0.566 | 8%  | 8%  | 1.000 |
| Precise             | 1%   | 10%  | 0.005 | 1%  | 7%  | 0.066 |
| Protection device*# |      |      |       |     |     |       |
| FilterWire          | 57%  | 60%  | 0.718 | 57% | 51% | 0.422 |
| EmboShield          | 30%  | 27%  | 0.596 | 30% | 34% | 0.569 |
| MOMA                | 7%   | 9%   | 0.832 | 7%  | 11% | 0.496 |
| None                | 5%   | 2%   | 0.267 | 5%  | 2%  | 0.447 |

\*Only the most frequently used devices are listed. #In some cases, distal protection was combined with proximal occlusion device.
